# Supplementary material
Source: Research Square preprint supplement (doi:10.21203/rs.3.rs-9265483/v1)
Supplement: Supplementary file 1 [file d2e2b964c1ab924cd30afa3e.docx]

**Supplementary Table 1.** Sensibility, specificity and duration of the short test used in the cognitive impairment detection screenings.

| Validated screening test | Sensibility | Specificity | Duration (minutes) |
| --- | --- | --- | --- |
| Memory Impairment Screening (MIS) | 0,74 | 0,96 | 2 |
| SPMSQ de Pfeiffer | 0,85 | 0,79 | 3 |
| Verbal Semantic Fluency (VSF) | 0,74 | 0,80 | 1 |

**Supplementary Table 2.** Score allocation assigned to each risk factor in order to create the cumulative risk SCORE

| **Variable** | **Categorization** | **Puntuation in the score** | **Contribution (%)** |
| --- | --- | --- | --- |
| CRQ | Low | 1 | 5% |
| Medium/low | 1 |
| Medium/high | 0 |
| High | 0 |
| GDS5 | Symptom~~p~~s of depression | 1 | 3% |
| No symptom~~p~~s of depression | 0 |
| LSNS6 | Risk | 1 | 5% |
| No risk | 0 |
| Tobacco | Smoker | 1 | 2% |
| Passive smoker | 0 |
| Ex-smoker | 0 |
| Non-smoker | 0 |
| Physical activity | Low | 1 | 2% |
| Moderate | 1 |
| High | 0 |
| BMI | Underweight | 1 | 1% |
| Obesity | 1 |
| Overweight | 1 |
| Normal weight | 0 |
| LDL | ≥ 100 mg/dL | 1 | 7% |
| < 100 mg/dL | 0 |
| Alcohol consumption | Yes | 1 | 1% |
| No | 0 |
| Hearing loss | Yes | 1 | 7% |
| No | 0 |
| TBI | Yes | 1 | 3% |
| No | 0 |
| Diabetes | Yes | 1 | 2% |
| No | 0 |
| Hypertension | Yes | 1 | 2% |
| No | 0 |
| Visual loss | Yes | 1 | 2% |
| No | 0 |
| **Abbreviations**: CRQ: cognitive reserve questionnaire; GDS5: Geriatric Depression Scale – 5 items; LSNS6: Lubben Social Network Scale – 6 items; LDL, low density lipoprotein; BMI, body mass index; TBI, traumatic brain injury | | | |

**Supplementary Table 3.** Prevalence of each risk factor in the general population and stratified by sex (women vs men)

| Variables | General population  (n = 1162) | Sex differences | | |
| --- | --- | --- | --- | --- |
| Women  (n = 782) | Men  (n = 380) | P-value |
| Low cognitive reserve | 38.8% | 42.7% | 32.2% | **0.010** |
| Diabetes | 21.7% | 19.7% | 25.8% | **0.023** |
| Hypertension | 55.8% | 54.8% | 57.8% | 0.373 |
| LDL | 59.5% | 61.3% | 56.3% | 0.411 |
| BMI | 69.9% | 66.9% | 75.9% | **0.002** |
| Physical inactivity | 75.6% | 80.7% | 66.9% | **<0.001** |
| Hearing loss | 39.5% | 35.9% | 45.8% | **0.014** |
| Visual loss | 47.2% | 50.8% | 41.3% | 0.249 |
| TBI | 5.9% | 5.8% | 6.1% | 1.000 |
| Alcohol | 33.4% | 26.3% | 50.0% | **<0.001** |
| Social isolation | 14.4% | 14.0% | 14.9% | 0.844 |
| Depression | 28.6% | 34.2% | 18.9% | **<0.001** |
| Tobacco | 40.2% | 30.2% | 60.5% | **<0.001** |
| **Test**: Chi squared test  **Abbreviations**: LDL: low density lipoprotein; BMI: body mass index; TBI: traumatic brain injury.  **P-value** <0.05 | | | | |

**Supplementary Table 4.** Odds ratios (ORs) with 95% confidence intervals (CIs) of the different risk factors for cognitive decline

| **Variables** | **Women** | | **Men** | |
| --- | --- | --- | --- | --- |
| **ORs (CI 95%)** | **p-value** | **ORs (CI 95%)** | **p-value** |
| **Cognitive reserve** | | | | |
| Low | Reference |  | Reference |  |
| Medium/low | 0.50 (0.26, 0.95) | **0.035** | 0.34 (0.13, 0.87) | **0.028** |
| Medium/high | 0.27 (0.14, 0.50) | **<0.001** | 0.24 (0.09, 0.58) | **0.002** |
| High | 0.23 (0.11, 0.45) | **<0.001** | 0.17 (0.07, 0.41) | **<0.001** |
|  |  |  |  |  |
| **Cardiovascular comorbidities** | | | | |
| Diabetes | 1.28 (0.87, 1.89) | 0.206 | 1.44 (0.85, 2.41) | 0.169 |
| Hypertension | 1.16 (0.84, 1.61) | 0.359 | 0.92 (0.57, 1.48) | 0.722 |
| LDL | 0.93 (0.47, 1.87) | 0.845 | 0.59 (0.22, 1.53) | 0.277 |
| Obesity |  |  |  |  |
| BMI | 1.03 (0.99, 1.07) | 0.117 | 1.06 (1.00, 1.14) | **0.044** |
|  |  |  |  |  |
| Physical activity |  |  |  |  |
| Low | Reference |  | Reference |  |
| Moderate | 0.87 (0.53, 1.44) | 0.576 | 1.97 (0.85, 5.01) | 0.132 |
| High | 0.26 (0.10, 0.58) | **0.002** | 1.46 (0.56, 4.07) | 0.448 |
|  |  |  |  |  |
| **Depression** |  |  |  |  |
| GDS5 |  |  |  |  |
| No risk | Reference |  | Reference |  |
| Risk | 1.68 (1.06, 2.67) | **0.027** | 1.31 (0.61, 2.69) | 0.480 |
|  |  |  |  |  |
| **Social isolation** |  |  |  |  |
| LSNS6 |  |  |  |  |
| No risk | Reference |  | Reference |  |
| Risk | 2.15 (1.17, 3.90) | **0.012** | 2.10 (0.94, 4.55) | 0.063 |
|  |  |  |  |  |
| Hearing loss | 0.75 (0.45, 1.20) | 0.236 | 1.05 (0.56, 1.94) | 0.886 |
| Visual loss | 0.81 (0.35, 1.83) | 0.606 | 0.80 (0.24, 2.54) | 0.714 |
| Traumatic brain injury | 0.82 (0.23, 2.35) | 0.729 | 4.46 (1.27, 15.84) | **0.018** |
|  |  |  |  |  |
| **Tobacco** |  |  |  |  |
| Non-smoker | Reference |  | Reference |  |
| Ex - smoker | 0.67 (0.42, 1.05) | 0.085 | 0.75 (0.45, 1.25) | 0.270 |
| Smoker | 0.65 (0.27, 1.39) | 0.292 | 1.05 (0.43, 2.43) | 0.907 |
| Passive smoker | 1.08 (0.50, 2.22) | 0.847 | 0.98 (0.26, 3.13) | 0.980 |
| **Test:** Logistic regression  **Abbreviations**: BMI: body mass index; GDS5: Geriatric Depression Scale – 5 items; LSNS6: Lubben Social Network Scale – 6 items.  Model is adjusted for age  **P-value** <0.05 | | | | |
